# Supplementary material for: Grape-Leaf Extract Attenuates Alcohol-Induced Liver Injury via Interference with NF-κB Signaling Pathway
Source: MDPI journal article supplement (doi:10.3390/biom10040558), 2020-04-06
Supplement: s1 [file s1]

## **Supplementary data**

### **Methods:**

#### **Experimental design**

Five male Sprague Dawley rats were orally administered with ethanol (EtOH, 50%, 6 g/kg/day) for 12 days. Rats were anesthetized using thiopental (40 mg/kg, IP) and blood samples were collected from retro-orbital plexuses initially and every 4 days (i.e.; at 0, 4, 8, and 12 days). Centrifugation (2000 g, 15 min, 4 °C) was then performed after the samples were allowed to clot for 45 min, and the retrieved serum was stored at -80 °C for further measurements.

#### **Assessment of biochemical markers of liver function in serum**

Serum glutamic oxaloacetic transaminase (sGOT), serum glutamic pyruvic transaminase (sGPT), gamma-glutamyl transferase (GGT), alkaline phosphatase (ALK-p) and albumin were measured spectrophotometrically in serum using commercial kits (SPINREACT, Sant Esteve de Bas, Spain) in accordance with the provided instructions.

### **Results**

#### **EtOH-induced changes in liver markers.**

As shown in Fig 1, EtOH caused a significant increase in sGPT starting at day 4 (compared with day 0) of EtOH intake. Moreover, EtOH caused significant increases in sGOT, ALK-P and GGT starting at days 8 (sGOT and ALK-P) or 12 (GGT) of intake. Albumin was significantly decreased only at day 12 of EtOH intake.

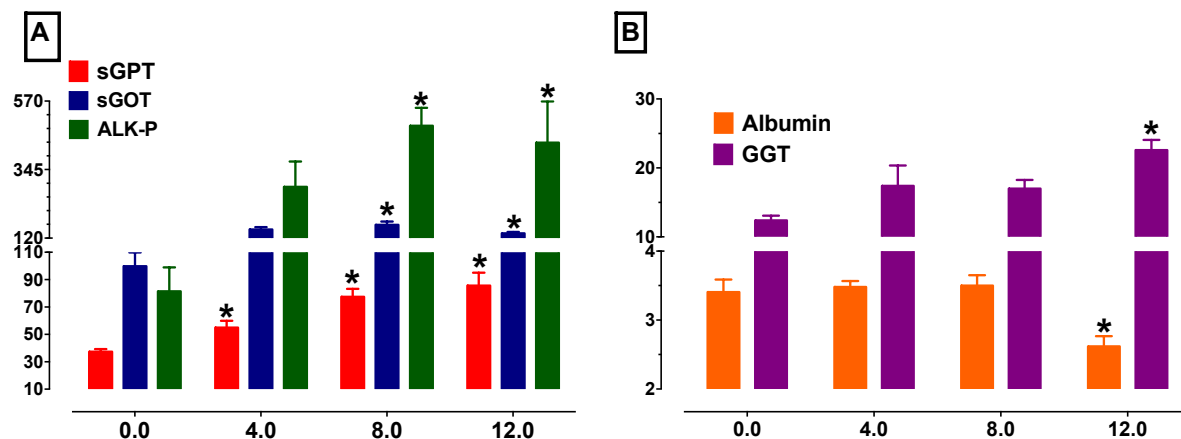

**Figure 1: Effects of EtOH on markers of liver injury at different time points.** The data shown are the means  $\pm$  SEM (n=5). \*  $p \leq 0.05$  compared with day 0. Statistical analysis was performed using one-way analysis of variance test (ANOVA) followed by Tukey's multiple comparison test for each marker separately. sGPT: Serum glutamic pyruvic transaminase; sGOT: Serum glutamic oxaloacetic transaminase; ALK-P: Alkaline phosphatase; GGT: Gamma-glutamyl transferase.
